# Supplementary material for: Leptin as a mediator of tumor-stromal interactions promotes breast cancer stem cell activity
Source: PubMed Central journal article supplement (PMC4811458; doi:10.18632/oncotarget.6014), 2015-10-27
Supplement: oncotarget-07-1262-s001.pdf [file oncotarget-07-1262-s001.pdf]

## SUPPLEMENTARY FIGURES AND TABLES

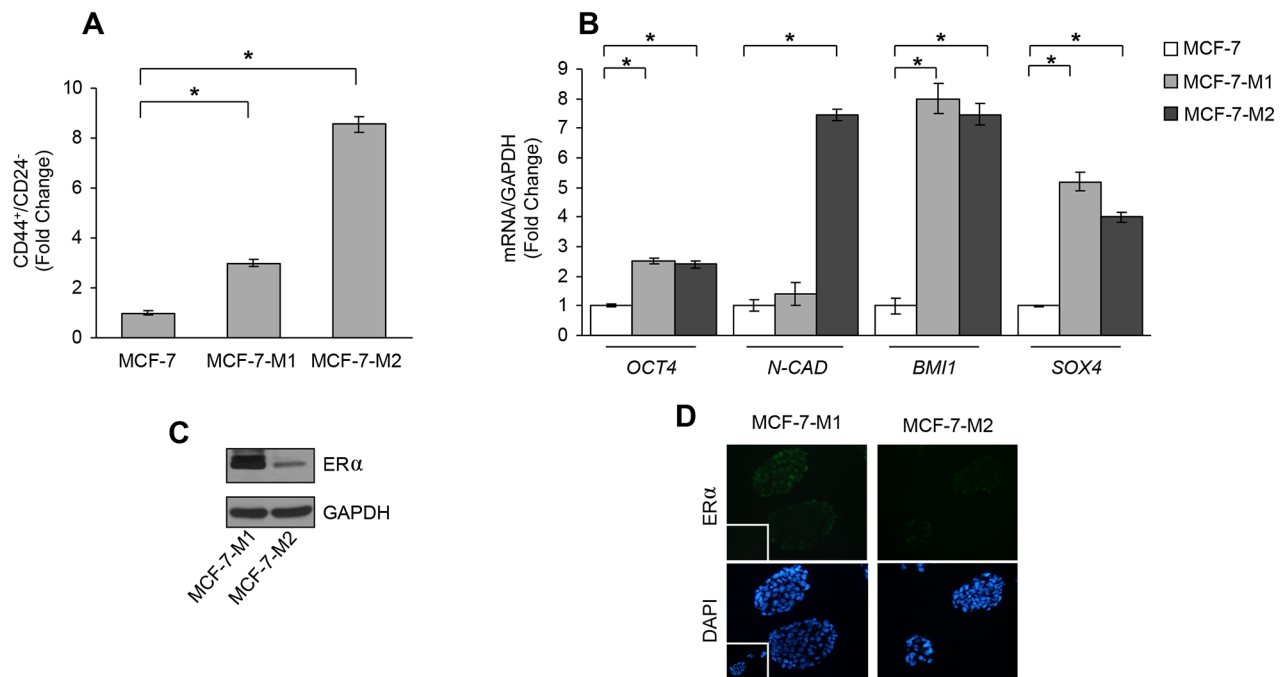

**Supplementary Figure S1:** **A.** Flow cytometric analysis of CD44<sup>+</sup>/CD24<sup>-</sup> phenotype in MCF-7 monolayer cells, and in MCF-7 cells grown as primary- (MCF-7-M1) and secondary-mammospheres (MCF-7-M2). The values represent the means  $\pm$  s.d. of three different experiments each performed in triplicate.  $*p < 0.05$ . **B.** *OCT4*, *N-CAD*, *BMI1* and *SOX4* mRNA content evaluated by real-time RT-PCR in MCF-7, MCF-7-M1 and MCF-7-M2 cells. Each sample was normalized to its *GAPDH* mRNA content. The values represent the means  $\pm$  s.d. of three different experiments each performed in triplicate.  $*p < 0.05$ . **C.** Immunoblotting for estrogen receptor (ER)- $\alpha$  in MCF-7-M1 and MCF-7-M2 cells. GAPDH as loading control. **D.** Immunofluorescence of ER $\alpha$  and DAPI staining (for nuclei detection) in MCF-7-M1 and MCF-7-M2 cells. Small squares, negative control.

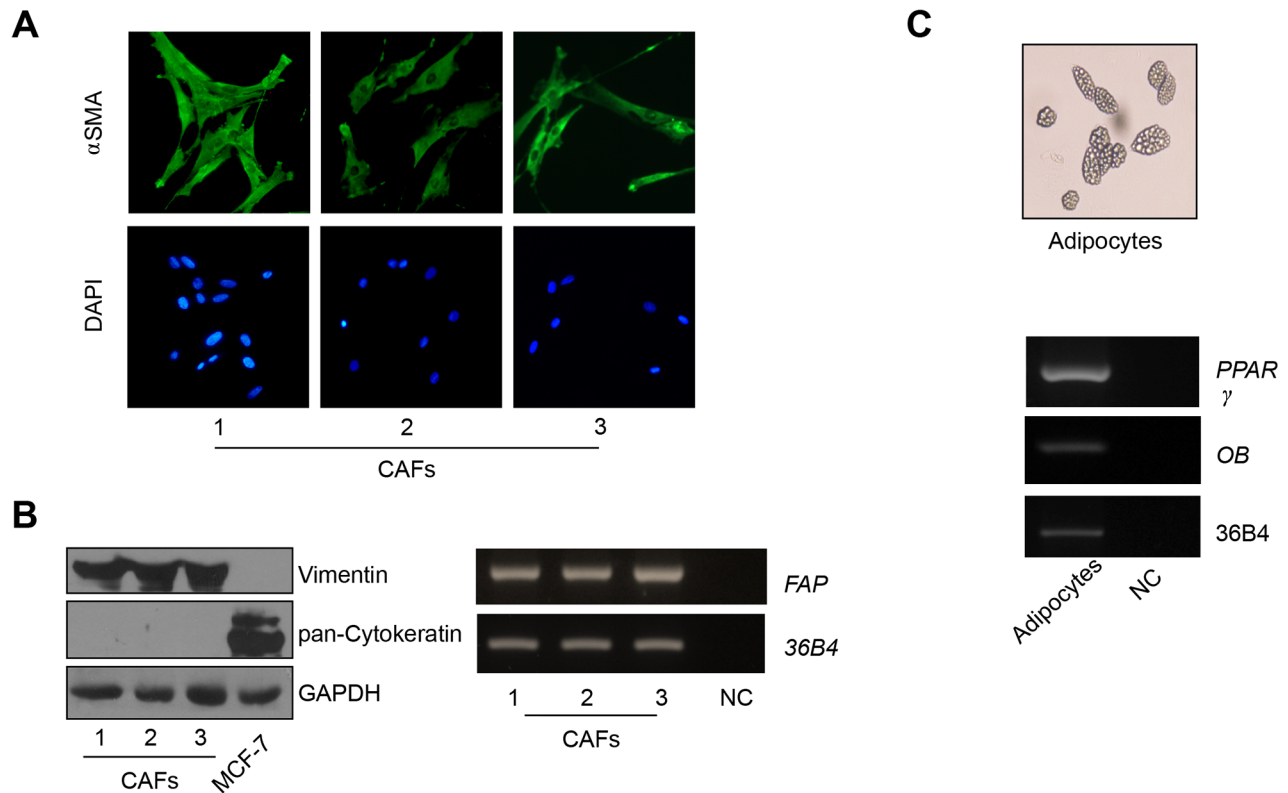

**Supplementary Figure S2:** **A.** Cancer Associated Fibroblasts (CAFs) were isolated from primary breast tumour biopsies by collagenase digestion. Immunofluorescence of alpha-smooth muscle actin ( $\alpha$ -SMA) and DAPI staining (for nuclei detection). **B.** *Left panel*, immunoblotting of Vimentin and pan-Cytokeratin protein expression, GAPDH as loading control. *Right panel*, RT-PCR analysis of Fibroblast Activation Protein (*FAP*) mRNA levels. **C.** Subcutaneous preadipocytes from breast tissues were stimulated to differentiate into mature adipocytes. *Upper panel*, a typical bright-field picture of adipocytes characterized by accumulation of lipid droplets; *lower panel*, RT-PCR analysis, for expression of the specific adipocyte markers *PPAR $\gamma$*  and leptin (*OB*). *36B4* (internal standard). NC, negative control.

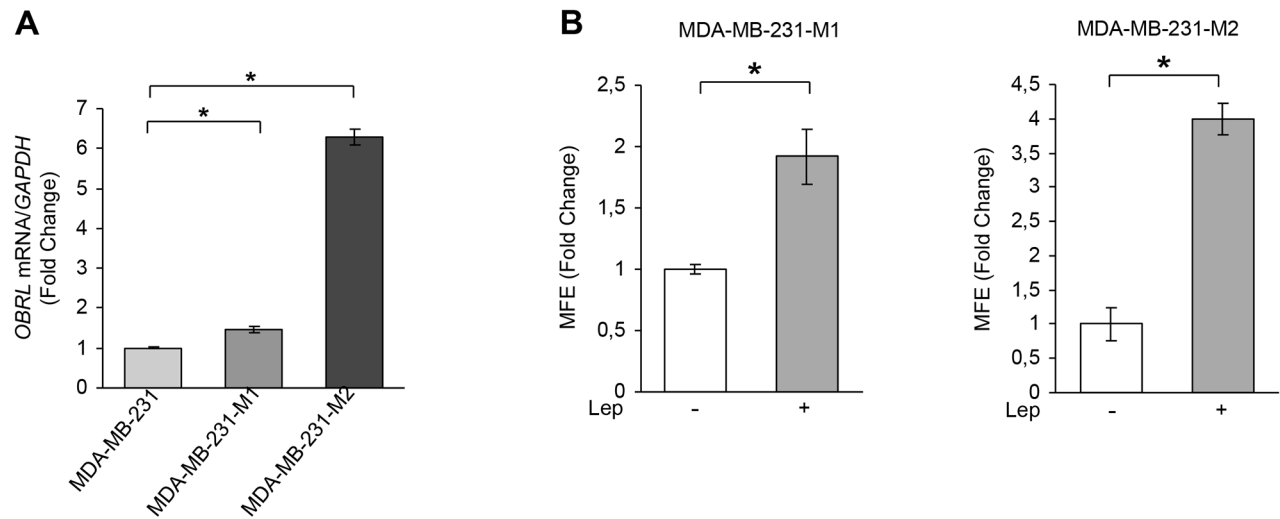

**Supplementary Figure S3:** **A.** Leptin receptor long (*OBRL*) mRNA content evaluated by real-time RT-PCR in MDA-MB-231, MDA-MB-231-M1 and MDA-MB-231-M2 cells. Each sample was normalized to its *GAPDH* mRNA content. **B.** MFE evaluated in MDA-MB-231-M1 and MDA-MB-231-M2 cells in the presence or absence (-) of leptin 500 ng/ml (Lep) in the mammosphere culture media. The values represent the means  $\pm$  s.d. of three different experiments each performed in triplicate. \* $p < 0.05$ .

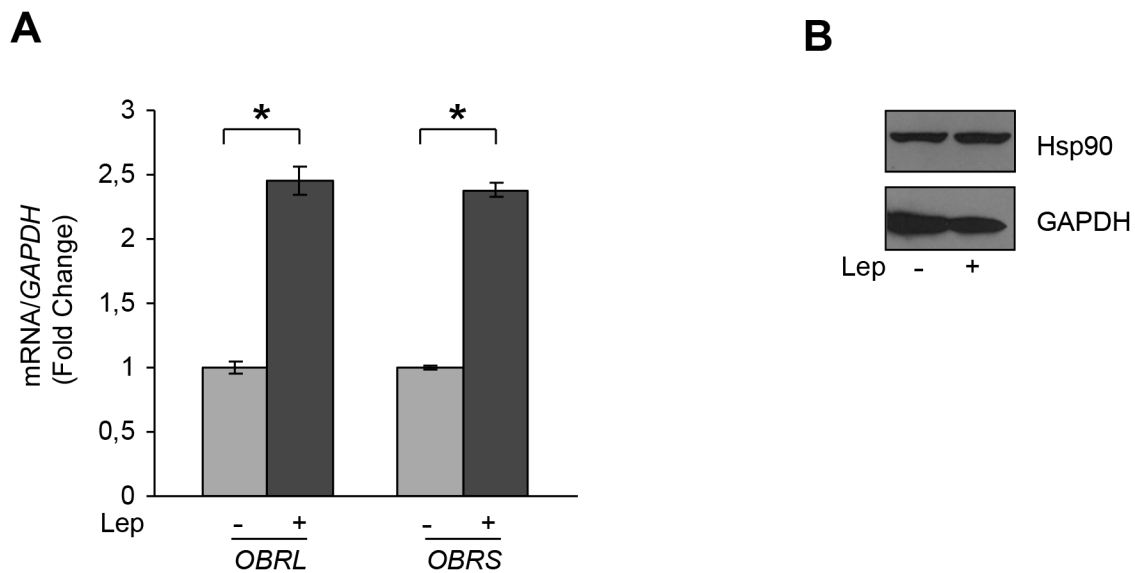

**Supplementary Figure S4:** **A.** Leptin receptor long (*OBRL*) and short (*OBRS*) mRNA content evaluated by real-time RT-PCR in MCF-7-M1 cells. Each sample was normalized to its *GAPDH* mRNA content. The values represent the means  $\pm$  s.d. of three different experiments each performed in triplicate.  $*p < 0.05$ . **B.** Immunoblotting analysis of HSP90 levels in total protein extracts from MCF-7-M1 cells in the presence or absence (-) of leptin 500 ng/ml (Lep) in the mammosphere culture media. GAPDH was used as loading control.

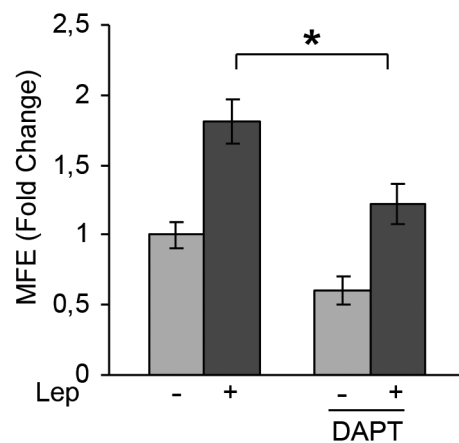

**Supplementary Figure S5:** MFE evaluated in MCF-7-M1 cells treated with leptin 500 ng/ml (Lep) in the presence or absence (-) of DAPT (5  $\mu$ M) in the mammosphere culture media. The values represent the means  $\pm$  s.d. of three different experiments each performed in triplicate.  $*p < 0.05$ .

**Supplementary Table S1: Oligonucleotide primers used in this study**

| Gene symbol                    | Gene name                                          | Primer sequences                                                               |
|--------------------------------|----------------------------------------------------|--------------------------------------------------------------------------------|
| <i>PPAR<math>\gamma</math></i> | Peroxisome Proliferator-Activated Receptor gamma   | For 5'-GAGTTCATGCTTGTCAAGGATGC-3'<br>Rev 5'-CGATATCACTGGAGATCTCGCC-3'          |
| <i>OB</i>                      | Leptin                                             | For 5' -GAGACCTCCTCCATGTGCTG-3'<br>Rev 5'- TGAGCTCAGATATCGGGCTGAAC-3'          |
| <i>FAP</i>                     | Fibroblast activation protein                      | For 5'-AGAAAGCAGAAGCTGGATGG-3'<br>Rev 5'-ACACACTTCTTGCTTGGAGGAT-3'             |
| <i>36B4</i>                    | 36B4                                               | For 5'-CTCAACATCTCCCCCTTCTC-3'<br>Rev 5'- CAAATCCCATATCCTCGT -3'               |
| <i>GAPDH</i>                   | glyceraldehyde-3-phosphate dehydrogenase           | For 5'- CCCACTCCTCCACCTTTGAC-3'<br>Rev 5'- TGTTGCTGTAGCCAAATTCGTT-3'           |
| <i>OBRL</i>                    | Leptin Receptor Long Isoform                       | For 5'-GATAGAGGCCAGGCATTTTTTA-3'<br>Rev 5'- CACCACTCTCTCTTTTTTGATTGA-3'        |
| <i>OBRS</i>                    | Leptin Receptor Short Isoform                      | For 5'-ATTGTGCCAGTAATTATTTCTCTTCC-3'<br>Rev 5'-CCACCATATGTTAACTCTCAGAAGTTCA-3' |
| <i>CD44</i>                    | CD44 molecule                                      | For 5'- CCTTTGATGGACCAATTACCATAAC-3'<br>Rev 5'- TCAGGATTCGTTCTGTATTCCTC-3'     |
| <i>OCT4</i>                    | POU class 5 homeobox 1 (POU5F1)                    | For 5'- AGCGACTATGCACAACGAGA-3'<br>Rev 5'- CCATAGCCTGGGTACCAAA-3'              |
| <i>N-CAD</i>                   | N-cadherin                                         | For 5'- ACAGTGGCCACCTACAAAGG-3'<br>Rev 5'- CCGAGATGGGGTTGATAATG-3'             |
| <i>NOTCH1</i>                  | Notch 1                                            | For 5'-GTGACTGCTCCCTCAACTTCAAT-3'<br>Rev 5'-CTGTACAGTGGCCGTCACT-3'             |
| <i>SMO</i>                     | Smoothened, frizzled family receptor               | For 5'- CACCCTGGCCACATTCGT-3'<br>Rev 5'- CGCATTGACGTAGAAGAGAATAACA-3'          |
| <i>BMI1</i>                    | Polycomb ring finger oncogene                      | For 5'- GTGCTTTGTGGAGGGTACTTCAT-3'<br>Rev 5'-TACACGTTTTACAGAAGGAATGTAGAC-3'    |
| <i>SUZ12</i>                   | SUZ12 polycomb repressive complex 2 subunit        | For 5'- AGCTTACGTTTACTGGTTTCTTCCA-3'<br>Rev 5'- GCAAACTTTACAAGCAGGACTT-3'      |
| <i>BMP7</i>                    | Bone morphogenetic protein 7                       | For 5'-GGGAACGCTTCGACAATGAG-3'<br>Rev 5'- CGATTCCCTGCCCAAGTG-3'                |
| <i>BMPR2</i>                   | Bone morphogenetic protein receptor, type II       | For 5'- GCCTTTGGGAGAAATCAAAGGGG-3'<br>Rev 5'- CATTCTGAATTGAGGGAGGAGTGG-3'      |
| <i>YES1</i>                    | v-yes-1 Yamaguchi sarcoma viral oncogene homolog 1 | For 5'- CCTCGAGAATCTTTGCGACTAGA-3'<br>Rev 5'-CCATTCCATGTTCCCATCCA-3'           |
| <i>SMAD4</i>                   | SMAD family member 4                               | For 5'-GGAGCTCATCCTAGTAAATG-3'<br>Rev 5'-GACGGGCATAGATCACATGA-3'               |
| <i>SOX4</i>                    | SRY (sex determining region Y)-box 4               | For 5'- GGCCTCGAGCTGGGAATCGC-3'<br>Rev 5'- GCCCACTCGGGTCTTGAC-3'               |
| <i>MAPK6</i>                   | Mitogen-activated protein kinase 6                 | For 5'-GTCGGAGAAGTCCCGTTGTATC-3'<br>Rev 5'-TCCAGCTCACCACAATCACAAT-3'           |
| <i>SKT36</i>                   | Serine/threonine kinase 36                         | For 5'- CGCATCCTACACCGAGATATGA-3'<br>Rev 5'- GCAAATCCAAAGTCACAGAGCTT-3'        |

(Continued)

| Gene symbol     | Gene name                                        | Primer sequences                                                          |
|-----------------|--------------------------------------------------|---------------------------------------------------------------------------|
| <i>BIRC6</i>    | Baculoviral IAP repeat-containing protein 6      | For 5'- GGACCACCGCATCTCTACAT -3'<br>Rev 5'- GCAGTGGATGAAGCCAGCCT-3'       |
| <i>HSPA1A</i>   | Heat shock 70kDa protein 1A                      | For 5'- CCTGTGTTTGCAATGTTGAAATTT -3'<br>Rev 5'- CTCTGCATGTAGAAACCGGAAA-3' |
| <i>HSPD1</i>    | Heat shock 60kDa protein 1 (chaperonin)          | For 5'-GATGTTGATGGAGAAGCTCTAAGTACA-3'<br>Rev 5'-TGCCACAACCTGAAGACCAA-3'   |
| <i>HSPH1</i>    | Heat shock 105kDa/110kDa protein 1               | For 5'-AAATCAGCAAATCACTCATGCAA-3'<br>Rev 5'-ATGCTCGGCCATGAAATCTT-3'       |
| <i>HSP90AA1</i> | Heat shock protein 90kDa alpha, class A member 1 | For 5'-ATTGCCAGTTGATGTCATTGA-3'<br>Rev 5'-ATGCATCTGATGAATTTGAAATGAG-3'    |

**Supplementary Table S2: Selection of relevant modulated genes involved in stem cell biology in MCF-7-M2 derived cells**

| Gene symbol     | Gene name                                          | Lep   | Adipo-CM | CAF-CM |
|-----------------|----------------------------------------------------|-------|----------|--------|
| <i>BMI1</i>     | Polycomb ring finger oncogene                      | +4.10 | +3.63    | +5.23  |
| <i>SUZ12</i>    | SUZ12 polycomb repressive complex 2 subunit        | +3.43 | +3.25    | +3.73  |
| <i>YES1</i>     | v-yes-1 Yamaguchi sarcoma viral oncogene homolog 1 | +3.04 | +3.34    | +3.51  |
| <i>CSNK1G2</i>  | Casein kinase 1, gamma 2                           | +2.32 | +2.05    | +1.70  |
| <i>SOX4</i>     | SRY (sex determining region Y)-box 4               | +2.28 | +2.03    | +2.15  |
| <i>ALDH18A1</i> | Aldehyde dehydrogenase 18 family, member A1        | +2.24 | +2.51    | +3.24  |
| <i>EPCAM</i>    | Epithelial cell adhesion molecule                  | +2.15 | +1.28    | +2.23  |
| <i>BMP7</i>     | Bone morphogenetic protein 7                       | +2.10 | +3.11    | +3.26  |
| <i>YY1API</i>   | YY1 associated protein 1                           | +2.07 | +2.12    | +1.68  |
| <i>SMAD4</i>    | SMAD family member 4                               | +1.97 | +1.67    | +1.9   |
| <i>ALDH9A1</i>  | Aldehyde dehydrogenase 9 family, member A1         | +1.88 | +1.36    | +2.20  |
| <i>HIF1A</i>    | Hypoxia-inducible Factor 1, alpha subunit          | +1.74 | +1.23    | +2.18  |
| <i>BMPR2</i>    | Bone morphogenetic protein receptor, type II       | +1.69 | ns       | +1.82  |
| <i>SOX9</i>     | SRY (sex determining region Y)-box 9               | +1.59 | +1.59    | ns     |
| <i>YAP1</i>     | Yes-associated protein 1                           | +1.58 | +1.54    | +1.72  |
| <i>SIAH1</i>    | Siah E3 ubiquitin protein ligase 1                 | +1.58 | +1.17    | +1.55  |
| <i>STK36</i>    | Serine/threonine kinase 36                         | +1.50 | +1.27    | ns     |
| <i>ALDH6A1</i>  | Aldehyde dehydrogenase 6 family, member A1         | +1.50 | +1.48    | +1.24  |
| <i>NOTCH1</i>   | Notch 1                                            | +1.44 | +1.35    | ns     |
| <i>CD44</i>     | CD44 molecule (Indian blood group)                 | +1.44 | +1.16    | +1.33  |
| <i>YY1</i>      | YY1 transcription factor                           | +1.42 | +1.43    | +1.40  |

Numbers represent the ratio of the values of treated compared with untreated MCF-7 M2 spheres obtained by microarray data analysis. Statistical significance was calculated with the Illumina DiffScore, only genes with a DiffScore  $\leq -30$  and  $\geq 30$ , corresponding to a *p*-value of 0.001, were considered as statistically significant. ns: nonsignificant.

**Supplementary Table S3: Selection of relevant modulated genes involved in cell cycle control in MCF-7-M2 derived cells**

| Gene symbol    | Gene name                                                            | Lep   | Adipo-CM | CAF-CM |
|----------------|----------------------------------------------------------------------|-------|----------|--------|
| <i>MAPK6</i>   | Mitogen-activated protein kinase 6                                   | +6.27 | +6.27    | +7.90  |
| <i>CDC26</i>   | Cell division cycle 26 homolog (S. cerevisiae)                       | +3.85 | +5       | +4.8   |
| <i>DUSP1</i>   | Dual specificity protein phosphatase 1                               | +2.74 | +2.71    | +2.5   |
| <i>MAP3K1</i>  | Mitogen-activated protein kinase kinase kinase 1                     | +2.55 | +2.19    | +1.9   |
| <i>YWHAB</i>   | Tyrosine 3-monooxygenase/tryptophan 5-monooxygenase act pro, b       | +2.46 | +1,86    | +2.67  |
| <i>MCM6</i>    | Michromosome maintance complex componeny 6                           | +2,42 | +1.95    | +3.44  |
| <i>CDC23</i>   | Cell division cycle 23 homolog (S. cerevisiae)                       | +2.41 | +2.77    | +3.64  |
| <i>MKI67IP</i> | MKI67 (FHA domain) interacting nucleolar phosphoprotein              | +2.14 | +1.69    | +2.46  |
| <i>NFKB1</i>   | Nuclear factor of kappa light polypeptide gene enhancer in B-cells 1 | +1.81 | +1.21    | +1.31  |
| <i>CDC16</i>   | Cell division cycle 16 homolog (S. cerevisiae)                       | +1,79 | +1.8     | +1.7   |
| <i>CDK7</i>    | Cyclin-dependent kinase 7                                            | +1.75 | +1.3     | +1.74  |
| <i>BIRC6</i>   | Baculoviral IAP repeat-containing protein 6                          | +1.72 | +1.78    | +1.53  |
| <i>YWHAG</i>   | Tyrosine 3-monooxygenase/tryptophan 5-monooxygenase act pro, g       | +1.64 | +1.97    | +2.33  |
| <i>MAP3K7</i>  | Mitogen-activated protein kinase kinase kinase 7                     | +1.59 | +1.55    | +1.68  |
| <i>WEE1</i>    | WEE1 homolog (S. pombe)                                              | +1.59 | ns       | +1.41  |
| <i>E2F3</i>    | Transcription factor                                                 | +1.50 | +1.8     | +1.82  |
| <i>BIRC5</i>   | Baculoviral IAP repeat-containing protein 5                          | +1.32 | +1.27    | +1.75  |
| <i>BAD</i>     | BCL2-antagonist of cell death                                        | -1.44 | ns       | -1.23  |
| <i>CDC34</i>   | Cell division cycle 34 homolog (S. cerevisiae)                       | -1.64 | -1.36    | -1.84  |
| <i>RIPK1</i>   | Receptor (TNFRSF)-interacting serine-threonine kinase 1              | -1.73 | -1.65    | -2.06  |
| <i>TRAF2</i>   | TNF receptor-associated factor 2                                     | -1.85 | -1.24    | -1.82  |

(Continued)

| Gene symbol     | Gene name                                             | Lep   | Adipo-CM | CAF-CM |
|-----------------|-------------------------------------------------------|-------|----------|--------|
| <i>TNFRSF1A</i> | Tumor necrosis factor receptor superfamily, member 1A | -1.85 | -1.67    | -2.16  |
| <i>TRADD</i>    | TNFRSF1A-associated via death domain                  | -2.18 | -2.04    | -2.24  |
| <i>BAX</i>      | BCL2-associated X protein                             | -2.21 | -2.05    | -2.07  |
| <i>GADD45B</i>  | Growth arrest and DNA-damage-inducible beta           | -2.29 | -2.05    | -2.69  |

Numbers represent the ratio of the values of treated compared with untreated MCF-7 M2 spheres obtained by microarray data analysis. Statistical significance was calculated with the Illumina DiffScore, only genes with a DiffScore  $\leq -30$  and  $\geq 30$ , corresponding to a  $p$ -value of 0.001, were considered as statistically significant. ns: nonsignificant.

#### Supplementary Table S4: Expression profile of heat shock protein family related genes in MCF-7-M2 derived cells

| Gene symbol     | Gene name                                        | Lep   | AAdipo-CM | CAF-CM |
|-----------------|--------------------------------------------------|-------|-----------|--------|
| <i>HSP90B1</i>  | Heat shock protein 90kDa beta, member 1          | +2.38 | +2.20     | +2.7   |
| <i>HSP90AA1</i> | Heat shock protein 90kDa alpha, class A member 1 | +2.02 | +1.76     | +2.07  |
| <i>HSPH1</i>    | Heat shock 105kDa/110kDa protein 1               | +2.02 | +2.04     | +1.88  |
| <i>HSPB8</i>    | Heat shock 22kDa protein 8                       | +1.80 | +2.17     | +1.71  |
| <i>HSPA1A</i>   | Heat shock 70kDa protein 1A                      | +2.74 | +2.08     | +2.25  |
| <i>HSPE1</i>    | Heat shock 10kDa protein 1                       | +1.26 | ns        | +1.58  |
| <i>HSPA4</i>    | Heat shock 70kDa protein 4                       | +1.30 | +1.54     | +1.48  |
| <i>HSPD1</i>    | Heat shock 60kDa protein 1 (chaperonin)          | +1.39 | +1.28     | +1.33  |

Numbers represent the ratio of the values of treated compared with untreated MCF-7 M2 spheres obtained by microarray data analysis. Statistical significance was calculated with the Illumina DiffScore, only genes with a DiffScore  $\leq -30$  and  $\geq 30$ , corresponding to a  $p$ -value of 0.001, were considered as statistically significant. ns: nonsignificant.
